# Supplementary material for: Whole Exome Sequencing in Multi-Incident Families Identifies Novel Candidate Genes for Multiple Sclerosis
Source: MDPI journal article supplement (doi:10.3390/ijms231911461), 2022-09-28
Supplement: s1 [file s1]

**Figure S1.** Pedigrees with 18 rare variants of the nine multi-incident MS families. For each variant, the genotype is presented for each family member.

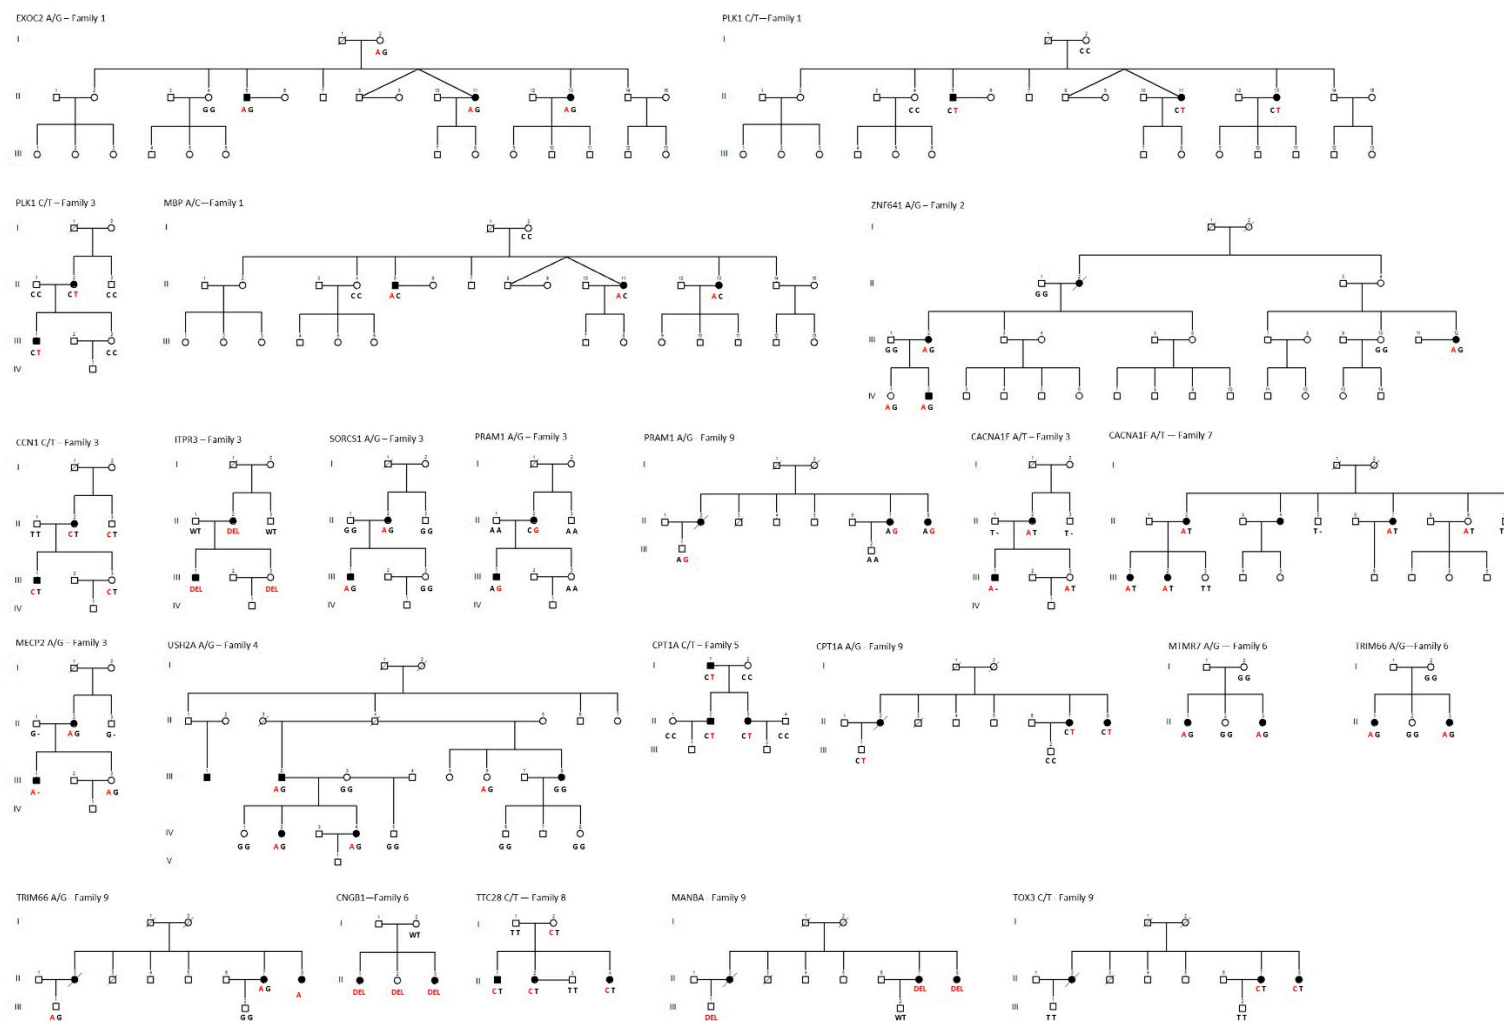

**Table S1.** An overview of the selection criteria that each of the 18 rare genetic variants meets is provided. If a variant or gene had a significant P-value in either the exome chip study [24] or based on the results from the genome-wide association study (GWAS) [23] – i.e. the gene-wide P-value – by the International Multiple Sclerosis Genetics Consortium (IMSGC), said P-value is provided.

| Gene           | Variant ID          | Amino Acid Change | Present in 2/9 Families | Literature Link(s) with MS | p-Value Exome Chip    | Gene-Wide p-Value     |
|----------------|---------------------|-------------------|-------------------------|----------------------------|-----------------------|-----------------------|
| <i>EXOC2</i>   | rs760365995         | p.Pro134Leu       |                         |                            |                       | $2.50 \times 10^{-3}$ |
| <i>PLK1</i>    | rs35056440          | p.Leu261Phe       | ✓                       |                            |                       |                       |
| <i>MBP</i>     | 18:74696828         | p.Gly151Val       |                         | ✓ [37,38]                  |                       |                       |
| <i>ZNF641</i>  | rs200502528         | p.His342Tyr       |                         |                            |                       | $3.76 \times 10^{-2}$ |
| <i>CCNI</i>    | rs139547927         | p.Tyr334Cys       |                         |                            |                       | $1.46 \times 10^{-3}$ |
| <i>ITPR3</i>   | 6:33648383–33648394 | -(DEL (a))        |                         |                            |                       | $2.65 \times 10^{-5}$ |
| <i>SORCS1</i>  | 10:108439392        | p.Ser554Leu       |                         |                            |                       | $3.74 \times 10^{-2}$ |
| <i>PRAM1</i>   | rs138042924         | p.Ser387Pro       | ✓                       |                            | $3.26 \times 10^{-2}$ | $3.55 \times 10^{-4}$ |
| <i>CACNA1F</i> | X:49067910          | p.Met1324Leu      | ✓                       |                            |                       |                       |
| <i>MECP2</i>   | rs61751445          | p.Thr311Met       |                         | ✓ [39,40]                  |                       |                       |
| <i>USH2A</i>   | rs200802261         | p.Pro2870Leu      |                         |                            | $2.76 \times 10^{-2}$ |                       |
| <i>CPT1A</i>   | rs140958507         | p.Arg288Gln       | ✓                       | ✓ [41]                     |                       |                       |
| <i>MTMR7</i>   | rs760803217         | p.Thr6Met         |                         |                            |                       | $2.83 \times 10^{-2}$ |
| <i>TRIM66</i>  | rs138444298         | p.Arg1037Trp      | ✓                       |                            |                       |                       |
| <i>CNGB1</i>   | rs776392588         | -(DEL (b))        |                         |                            |                       |                       |
| <i>TTC28</i>   | 22:28501278         | p.Tyr1099Cys      |                         |                            |                       | $3.15 \times 10^{-2}$ |
| <i>MANBA</i>   | rs1283991082        | -(DEL (c))        |                         |                            |                       |                       |
| <i>TOX3</i>    | 16:52580565         | p.Tyr24Cys        |                         |                            |                       | $3.07 \times 10^{-2}$ |

(a) Deletion of 12 nucleotides: GTGCTGAGCGTT>-

(b) Deletion of 7 nucleotides: AAGTAGT>-

(c) Deletion of 15 nucleotides: GAGCAAAGAAATTCT>-

**Table S3.** An overview of the sequences of the forward and reverse primers that were used for the Sanger sequencing and their optimal annealing temperatures in order to validate the 18 variants in the family members of the multi-incident MS families.

| Family | Chr   | Gene           | Variant ID              | Forward Primer                                   | Reverse Primer                                 | Optimal Annealing Temperature |
|--------|-------|----------------|-------------------------|--------------------------------------------------|------------------------------------------------|-------------------------------|
| 1      | chr6  | <i>EXOC2</i>   | rs760365995             | 5' TTCCTGGGATGTTTCTGGAG                          | 5' CCAACAGGCATTTTGTATTAGG                      | 59 °C                         |
| 1      | chr16 | <i>PLK1</i>    | rs35056440              | 5' AGGATGCCTGACCTTTGTTC                          | 5' GGTGGGATAGACCTATTTCTGG                      | 59 °C                         |
| 1      | chr18 | <i>MBP</i>     | 18:74696828             | 5' GAAATCCACGCGTAAATGC                           | 5' TGAACCACTCACCAGTCCAG                        | 59 °C                         |
| 2      | chr12 | <i>ZNF641</i>  | rs200502528             | 5' TCAGCCAGTGTCTCACAAGG                          | 5' GGCGAAGACATCACCTCATC                        | 59 °C                         |
| 3      | chr4  | <i>CCNI</i>    | rs139547927             | 5' AGAAACAGGCTGCAAAGGTG                          | 5' GCCCAGACTTCTCCAAGGAC                        | 59 °C                         |
| 3      | chr6  | <i>ITPR3</i>   | 6:33648383–<br>33648394 | 5' AGGAGGTGTGGGAGTGGAG<br>5' AGGAGGTGTGGGAGTGGAG | 5' ACCTGCAGGGAAGTGCTG<br>5' CTAGGCAAGTCGGCCCTG | 56 °C<br>58 °C                |
| 3      | chr10 | <i>SORCS1</i>  | 10:108439392            | 5' GGTTTTCTGCAGACTTGCTTC                         | 5' TATTTGGGGGATGGAAGATG                        | 59 °C                         |
| 3      | chr16 | <i>PLK1</i>    | rs35056440              | 5' AGGATGCCTGACCTTTGTTC                          | 5' GGTGGGATAGACCTATTTCTGG                      | 59 °C                         |
| 3      | chr19 | <i>PRAM1</i>   | rs138042924             | 5' CACCCACCTATGGATGCTG                           | 5' AGTCAGCGTGCTTCCCAAG                         | 59 °C                         |
| 3      | chrX  | <i>CACNA1F</i> | X:49067910              | 5' GTGGTGGTTGTGAGGAAATG                          | 5' ATCTCCTCATTCCCCAGTCC                        | 59 °C                         |
| 3      | chrX  | <i>MECP2</i>   | rs61751445              | 5' TCTGAGTGGTGGTGATGGTG                          | 5' CAGGTCATGGTGATCAAACG                        | 59 °C                         |
| 4      | chr1  | <i>USH2A</i>   | rs200802261             | 5' CGCTCACACAATGAAGACAC                          | 5' GTGCGAAACTGGCAGTAAAG                        | 59 °C                         |
| 5      | chr11 | <i>CPT1A</i>   | rs140958507             | 5' CCCGGCCACAACTGTATATT                          | 5' CAAAGTCAAAGTGGAGAAAATCA                     | 59 °C                         |
| 6      | chr8  | <i>MTMR7</i>   | rs760803217             | 5' CAGCAGCAGCTAAGGCTAGG                          | 5' CAGCCTGTACTCCCCATCTC                        | 59 °C                         |
| 6      | chr11 | <i>TRIM66</i>  | rs138444298             | 5' CAAGCCAGAGGAAACTGC                            | 5' CCAAGCCTGTGGCTAGAAAG                        | 59 °C                         |
| 6      | chr16 | <i>CNGB1</i>   | rs776392588             | 5' TCCGATCATCACAGAGAAAGC                         | 5' TCTGTCTTTTGCACAACATGC                       | 58 °C                         |

|   |       |                |              |                           |                            |       |
|---|-------|----------------|--------------|---------------------------|----------------------------|-------|
| 7 | chrX  | <i>CACNA1F</i> | X:49067910   | 5' GTGGTGGTTGTGAGGAAATG   | 5' ATCTCCTCATTCCCCAGTCC    | 59 °C |
| 8 | chr22 | <i>TTC28</i>   | 22:28501278  | 5' CTGAGACCCTTACTCCACACAG | 5' CCTTGAACGCCAGCTGAAC     | 59 °C |
| 9 | chr4  | <i>MANBA</i>   | rs1283991082 | 5' CTTGATCTTAGAAAACAATCC  | 5' GCCTCTCTGACTACTTGACC    | 56 °C |
| 9 | chr11 | <i>TRIM66</i>  | rs138444298  | 5' CAAGCCAGAGGAAAACCTGC   | 5' CCAAGCCTGTGGCTAGAAAG    | 59 °C |
| 9 | chr11 | <i>CPT1A</i>   | rs140958507  | 5' CCCGGCCACAACTGTATATT   | 5' CAAAGTCAAAGTGGAGAAAATCA | 59 °C |
| 9 | chr16 | <i>TOX3</i>    | 16:52580565  | 5' GCCAAAGAAAAGTGCAGCAG   | 5' CTCGACGGTGGATCTAGCG     | 59 °C |
| 9 | chr19 | <i>PRAM1</i>   | rs138042924  | 5' CACCCACCTATGGATGCTG    | 5' AGTCAGCGTGCTTCCCAAG     | 59 °C |
